# Supplementary material for: Dietary Habits Are Related to Phase Angle in Male Patients with Non-Small-Cell Lung Cancer
Source: MDPI journal article supplement (doi:10.3390/curroncol29110637), 2022-10-26
Supplement: s1 [file s1]

**Supplementary Table S1.** Component loadings derived using Principal Component Analysis for the identification of dietary patterns.

|                                        | 1                                      | 2                             | 3                                 | 4                |
|----------------------------------------|----------------------------------------|-------------------------------|-----------------------------------|------------------|
|                                        | Whole grains,<br>fruits,<br>vegetables | Potatoes,<br>meat,<br>poultry | High olive<br>oil, low<br>alcohol | Legumes,<br>fish |
| Whole wheat grains (portions/<br>week) | <b>0.559</b>                           | 0.352                         | 0.016                             | 0.005            |
| Potatoes (portions/week)               | 0.018                                  | <b>0.609</b>                  | 0.220                             | 0.265            |
| Fruit (portions/week)                  | <b>0.703</b>                           | -0.149                        | 0.247                             | -0.018           |
| Vegetables (portions/week)             | <b>0.832</b>                           | 0.048                         | -0.184                            | 0.062            |
| Legumes (portions/week)                | -0.027                                 | 0.098                         | -0.167                            | <b>0.729</b>     |
| Fish (portions/week)                   | 0.083                                  | -0.050                        | 0.131                             | <b>0.720</b>     |
| Meat (portions/week)                   | -0.083                                 | <b>0.607</b>                  | -0.059                            | -0.395           |
| Poultry (portions/week)                | 0.075                                  | <b>0.729</b>                  | -0.017                            | 0.017            |
| Dairy (portions/week)                  | 0.384                                  | -0.248                        | 0.440                             | 0.166            |
| Olive oil (portions/week)              | 0.093                                  | 0.101                         | <b>0.696</b>                      | -0.280           |
| Alcohol (portions/week)                | 0.085                                  | -0.083                        | <b>-0.741</b>                     | -0.136           |
| % Cumulative variance<br>explained     | 16.8                                   | 31.0                          | 43.2                              | 54.7             |

Higher absolute values of the loadings indicate that the food is correlated with the respective component. Numbers in bold indicate absolute loadings greater than 0.5, which correspond to a specific component.
